# Supplementary material for: Chromatin-mediated feed-forward auxin biosynthesis in floral meristem determinacy
Source: PubMed Central journal article supplement (PMC6289996; doi:10.1038/s41467-018-07763-0), 2018-12-11
Supplement: 41467_2018_7763_MOESM1_ESM.pdf [file 41467_2018_7763_MOESM1_ESM.pdf]

1 **Supplementary Materials**

2

3 Chromatin-mediated feed-forward auxin biosynthesis in floral meristem determinacy

4 Yamaguchi et al.

5

6

1

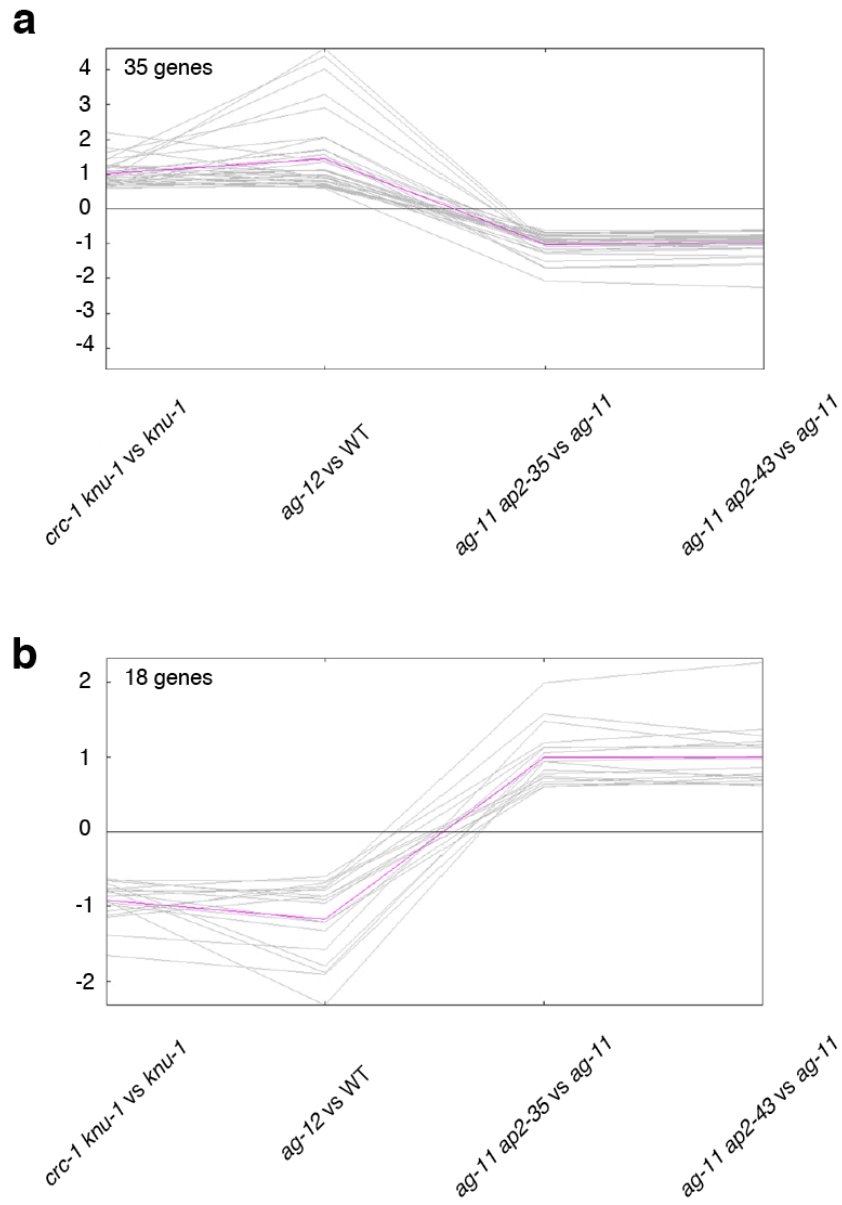

2  
3

4 **Supplementary Figure 1** Gene expression changes of 53 genes downstream of AG and CRC. **a**  
5 Graphs display log<sub>2</sub> expression changes of the 53 targets based on four public transcriptome  
6 datasets. One cluster contains the 35 genes that are upregulated in *crc-1 knu-1* compared to  
7 *knu-1*. **b** The other cluster contains the 18 genes that are downregulated in *crc-1 knu-1*  
8 compared to *knu-1*.

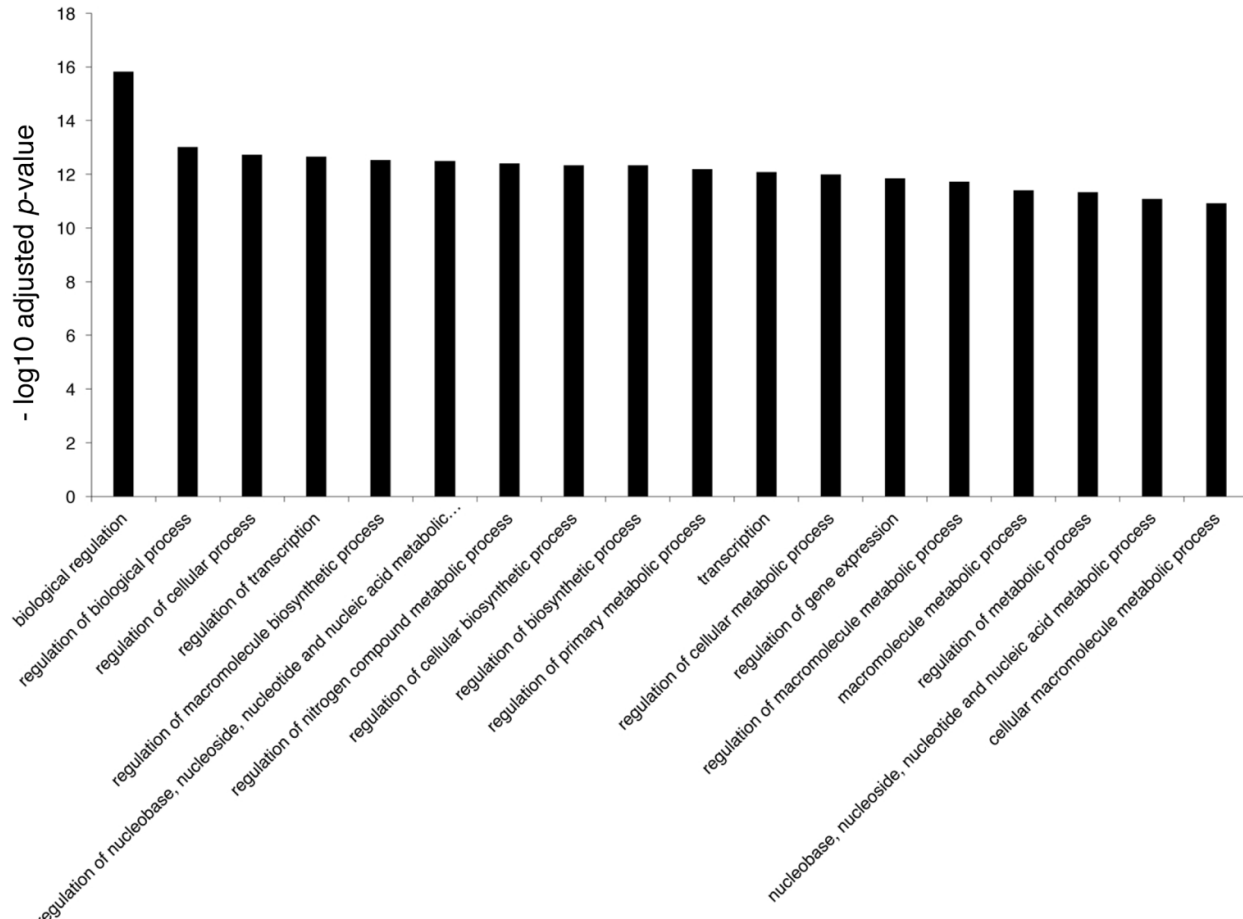

1  
 2 **Supplementary Figure 2** GO term enrichment analysis of the 53 genes. Graphs display  $-\log_{10}$   
 3 adjusted  $p$ -values of the 53 targets based on agriGO followed by REVIGO. The false discovery  
 4 rate (FDR) was lower than  $1.7 \times 10^{-10}$ .

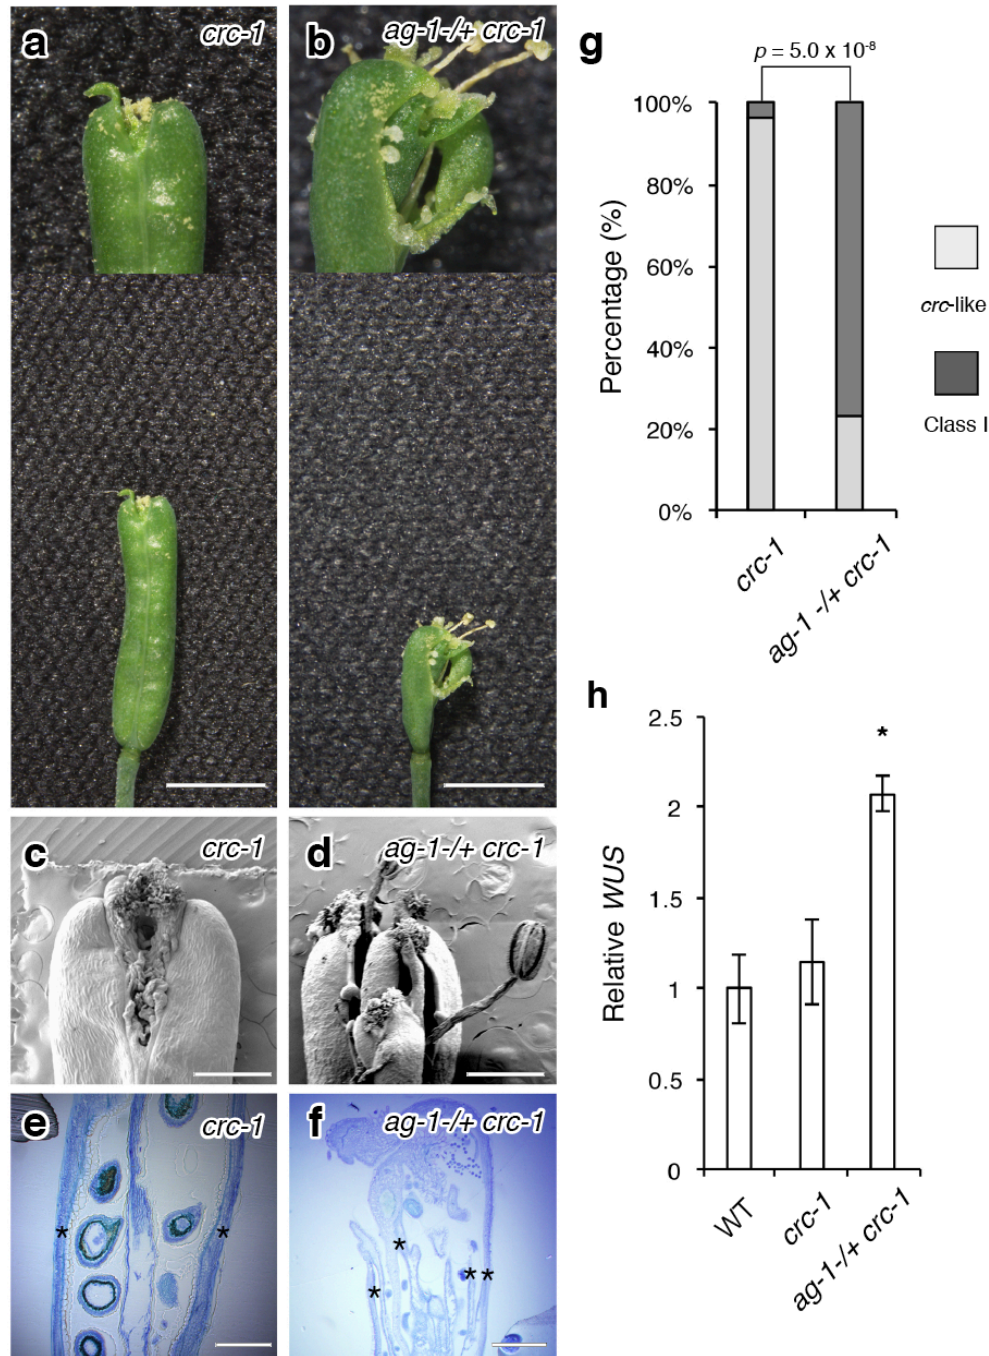

1  
2 **Supplementary Figure 3** Indeterminate phenotype of *ag-1 -/+ crc-1*. **a, b** Morphology of *crc-1*  
3 (**a**) and *ag-1 -/+ crc-1* (**b**) fruits. Above: Close-up views of fruit tips. Below: Whole fruits.  
4 Arrowheads indicate stigma structures. **c, d** Scanning electron micrograph of *crc-1* (**c**) and  
5 *ag-1 -/+ crc-1* (**d**) fruits. **e, f** Longitudinal section of *crc-1* (**e**) and *ag-1 -/+ crc-1* (**f**) fruits.  
6 Asterisks indicate carpels. **g** Quantification of the mutant phenotype. *p*-values were calculated  
7 with a Chi-Square test. **h** mRNA abundance of the stem cell marker *WUS* in wild-type, *crc-1*,  
8 and *ag-1 -/+ crc-1* flowers. The values are represented as the means  $\pm$  SEMs. *p*-values were  
9 calculated with a Student's *t*-test. Bars = 1 cm in **a, b**; 1 mm in **c, d**; 500  $\mu$ m in **e, f**.

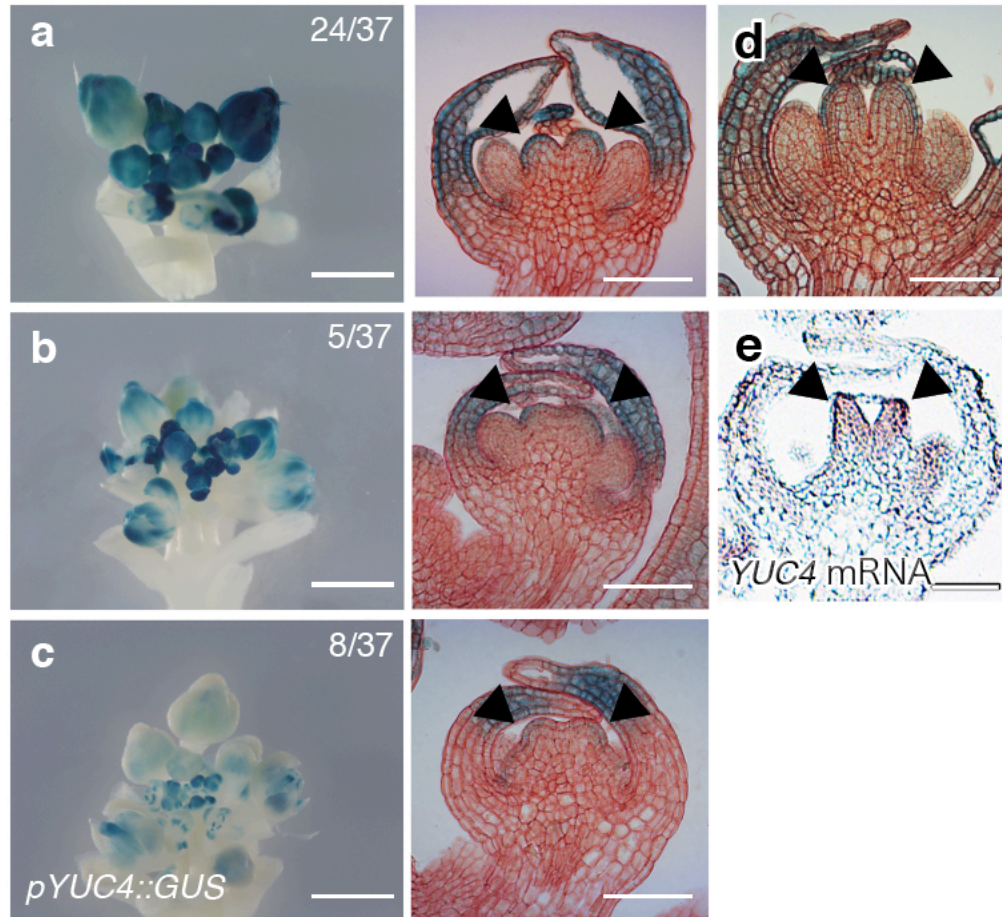

1  
2  
3  
4  
5  
6  
7  
8  
9  
10  
11

**Supplementary Figure 4** *YUC4* expression in floral buds. **a-c** GUS staining of *pYUC4::GUS* in the inflorescences (left) and stage 6 floral buds (right). Independent T1 lines were categorized in three difference classes depending on expression levels: lines with strong (**a**), intermediate (**b**), and weak (**c**) signals. Specifically, 24, 5, and 8 out of 37 lines showed strong, intermediate, and weak expression, respectively. The representative line from the strong category were shown. **d** GUS staining of *pYUC4::GUS* in the stage 7 floral buds. **e** *YUC4* expression pattern, as determined by *in situ* hybridization. Arrowheads indicate abaxial side of epidermal cells in carpels at stage 6. Bars = 3 mm in **a-c** (left); 50  $\mu$  m in **a-c** (right), **d**, **e**.

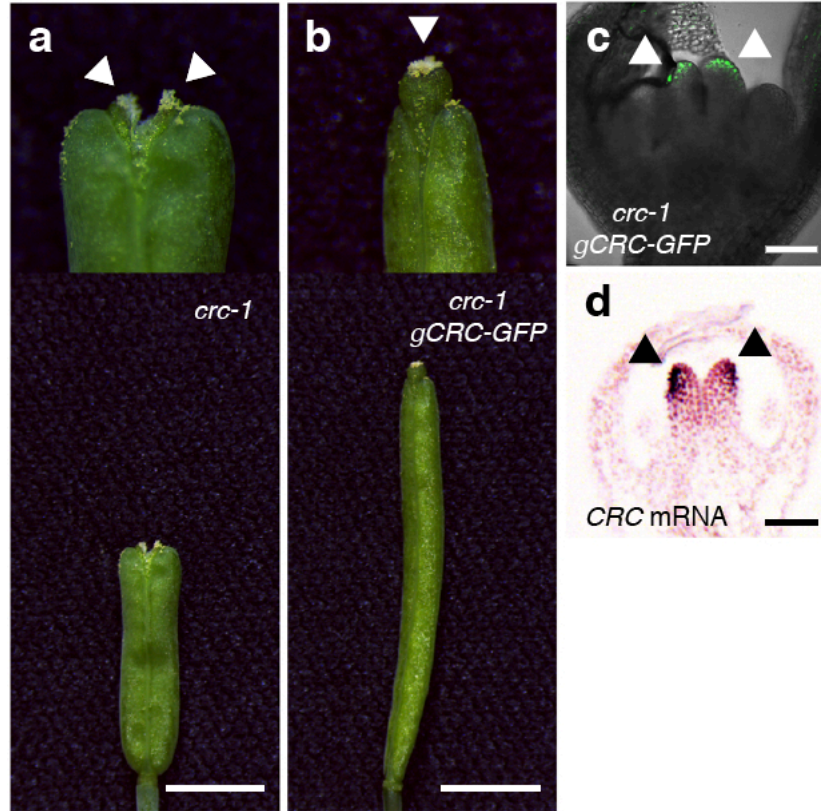

1  
2  
3  
4  
5  
6  
7  
8  
9

**Supplementary Figure 5** Expression of *gCRC-GFP* and *CRC* mRNA. **a, b** Phenotypic rescue of the *crc-1* mutant phenotype by *gCRC-GFP* expression. Morphology of *crc-1* (**a**) and *crc-1 gCRC-GFP* (**b**) plants. Top: Close-up views of fruit tips. Bottom: Whole fruits. Arrowheads indicate stigma structures. **c** *gCRC-GFP* expression in wild-type stage 6 floral buds. **d** *In situ* hybridization of *CRC* mRNA in wild-type stage 6 floral buds. Arrowheads indicate the abaxial side of carpel primordia. Bars = 5 mm in **a, b**; 50  $\mu$  m in **c, d**.

1

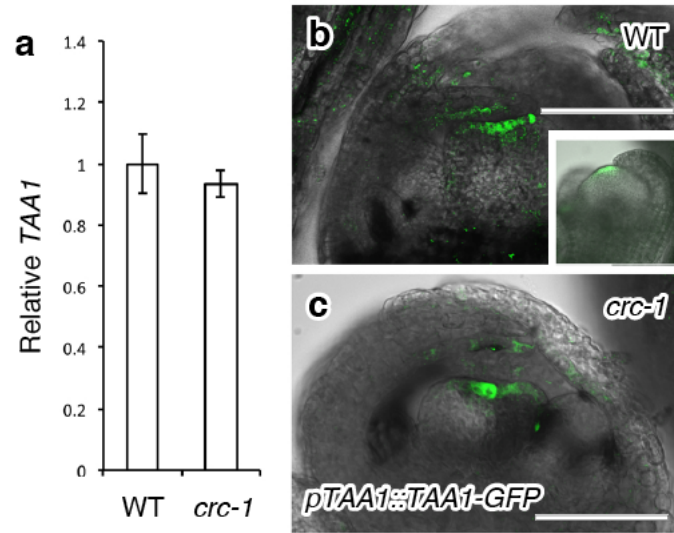

2  
3

4 **Supplementary Figure 6** *TAA1* expression in the *crc-1* mutant. **a** *TAA1* expression in wild-type,  
5 and *crc-1*. The values are represented as the means  $\pm$  SEMs. **b**, **c** *TAA1*-GFP in longitudinal  
6 sections of wild-type (**b**), and *crc-1* (**c**) stage 6 floral buds. Inset was *TAA1*-GFP expression in  
7 stage 4 floral buds. Bars = 50  $\mu$  m in **b**, **c**.

```

4TarvenseYUC4:58907-59887 -----TC-TAATATCATGTACTATGATGAGACAAACTGAGGGCAAATTCAGCCTGA
BnapusYUC41:12408-12873 TGTGTGGTCATGTAACATATGATCTATGATGAGACAAAATGAGGGAGAAATTCAGCCTGA
BrapaYUC4:18227-18692 TGTGTGGTCATGTAACATATGATCTATGATGAGACAAAATGAGGGAGAAATTCAGCCTGA
LalabamicaYUC4:10757-11228 AATGTGGTCATGTAACATATGTTGA--GACAAATCGAGAGTGAGGGCAAATTCAGCCTGA
AthaYUC4:1570-2042 AGTGTGGTCATGTAACATATGGTGA--GAAAAATTGAGGTTGAGGGCAAATTCAGCCTGA
AlyraYUC4:240239-240713 AGTGTGGTCATGTAACATATGGTFA--GACAAATGAGGTTGAGGGCAAATTCAGCCTGA
CrubellaYUC4:86652-87138 AGTGTGGTCATGTAACATATGGTGA--GACAAATGAGGCTGAGGGCAAATTCAGCCTGA
CsativaYUC4:41129-41606 AGTGTGGTCATGTAACATAT-----GGTATTGAGGTTGAGGGCAAATTCAGCCTGA
* * * * *

TarvenseYUC4:58907-59887 CAGAAAAATCCAAAGAGCATTGGGTCGTAATAAT-----GCAGAAGGAGAA--AATTA
BnapusYUC41:12408-12873 CAGAAAAATCCAAAGAGCACTGAGTCGGGAGGAT-----ACAGAATGAGAA--ATTTG
BrapaYUC4:18227-18692 CAGAAAAATCCAAAGAGCACTGAGTCGGGAGGAT-----GCAGAATGAGAA--AATTC
LalabamicaYUC4:10757-11228 CAGAAAAATCCAAAGGCATTTGCTCGGGTTAATG-----CATAAGAAGAAAATAGA
AthaYUC4:1570-2042 CAGAAAAAGTCCAAAGAGC-----ATTGAGTCGGATAATGCAGAAGGAGAA--ATTGG
AlyraYUC4:240239-240713 CAGAGAAAATCCAAAGAGC-----AGTGTAGGATAATGCAGAAGGAGAA--AATGG
CrubellaYUC4:86652-87138 CAGAAAAATCCAAAGAGAAAT-----ACTGAGTCGGATAATGCAGAAGGAGAA--AATGG
CsativaYUC4:41129-41606 CAGAAAAATCCAAAGAGCATTGAGTCGGAATGTCGGATAATGCAGAAAGGAGAA--AATGG
**** * * ***** ** * * * * *

TarvenseYUC4:58907-59887 TAGAAGAGGGCAGAGG---AAGATGACGCTTTTCTGGGACCCAAAATCTTTTTCTACT
BnapusYUC41:12408-12873 AAGAAGATGCCAGAGGAAGATATATGACGCTTGTGTAGGACCTAAAATCGTTTGTCTACA
BrapaYUC4:18227-18692 AAGAAGATGCCAGAGGAAGATATATGACGCTTGTGTAGGACCTAAAATCTTTTGTCTACA
LalabamicaYUC4:10757-11228 AATAAGAGTCCAAAGG---AAGATGATGTTT--TTGTAGGACATGATACTTTTGTCTGC
AthaYUC4:1570-2042 AAGAAGAGGCCAGAGC---AAGATGACGTTTTTATGGGACCCAAAATCTTTTGTCTAC
AlyraYUC4:240239-240713 AAGAAGATGCCAGAGG---AAGATGACGTTTTTATGGGACCCAAAATCTTTTGTCTAC
CrubellaYUC4:86652-87138 AAGAAGAGGCCAGAGG---AAGATGACGTTTTTATGGGACCGTTAAATCTTTTGTCTAC
CsativaYUC4:41129-41606 TAGAAGAGGCCAGAGG---AAGATGACGTTTTTATGGGACCCAAAATCTTTTGTCTAC
* * * * * * * * * * * * * * * * * * * * *

TarvenseYUC4:58907-59887 GTGTAAATATTCAATTTCTTGTTCATTATATCCAAAGTATATATGAACATCTCTATTGT
BnapusYUC41:12408-12873 GTATATAATATTCTTGTTTTGGCCAT-----
BrapaYUC4:18227-18692 GTATATAATATTCTTGTTTTGGCCAT-----
LalabamicaYUC4:10757-11228 ATTGTAATATTCAATTTTACCAT-----
AthaYUC4:1570-2042 ATTGTAATATTCAATTTTGGCCAT-----
AlyraYUC4:240239-240713 ATTGTAATATTCAATTTTGGCCAT-----
CrubellaYUC4:86652-87138 ATTGTAATATTCAATTTTGGCCAT-----
CsativaYUC4:41129-41606 ATTGTAATATTCAATTTTGGCCAT-----
* * * * * * * * * *

TarvenseYUC4:58907-59887 GATTTCTTAATGAGAACTTTATACTACAAGTAAATAAAAATAAATAAAGATTGAGAAA
BnapusYUC41:12408-12873 -----
BrapaYUC4:18227-18692 -----
LalabamicaYUC4:10757-11228 -----
AthaYUC4:1570-2042 -----
AlyraYUC4:240239-240713 -----
CrubellaYUC4:86652-87138 -----
CsativaYUC4:41129-41606 -----

TarvenseYUC4:58907-59887 AGATGATAACCTATTCTCAATTTAAAGATTTTGGATCCATGTGAAAATCCTTAACATAA
BnapusYUC41:12408-12873 -----
BrapaYUC4:18227-18692 -----
LalabamicaYUC4:10757-11228 -----
AthaYUC4:1570-2042 -----
AlyraYUC4:240239-240713 -----
CrubellaYUC4:86652-87138 -----
CsativaYUC4:41129-41606 -----

TarvenseYUC4:58907-59887 GGCATATACAGTATCAATATAATCTATGAGTGTGTGTGAGTAGTTCATATTTCTGAAAA
BnapusYUC41:12408-12873 -----
BrapaYUC4:18227-18692 -----
LalabamicaYUC4:10757-11228 -----
AthaYUC4:1570-2042 -----
AlyraYUC4:240239-240713 -----
CrubellaYUC4:86652-87138 -----
CsativaYUC4:41129-41606 -----

TarvenseYUC4:58907-59887 TAGATCAAAAACACAATAATTTAGAATATTAATTTAAAAATTGTATGTTGTAATATATATT
BnapusYUC41:12408-12873 -----
BrapaYUC4:18227-18692 -----
LalabamicaYUC4:10757-11228 -----
AthaYUC4:1570-2042 -----
AlyraYUC4:240239-240713 -----
CrubellaYUC4:86652-87138 -----
CsativaYUC4:41129-41606 -----

```



TarvenseYUC4:58907-59887 TAGATCAAAAACACAATAATTTAGAATATTAATTA AAAATFGTATGTTGTAATATATAT  
BnapusYUC41:12408-12873 -----  
BrapaYUC4:18227-18692 -----  
LalabamicaYUC4:10757-11228 -----  
AthaYUC4:1570-2042 -----  
AlyraYUC4:240239-240713 -----  
CrubellaYUC4:86652-87138 -----  
CsativaYUC4:41129-41606 -----

TarvenseYUC4:58907-59887 TATCAAAGTCTGTTATGCATAAGTTAAATTATATACTAATATCATTTTCAATTGGTATT  
BnapusYUC41:12408-12873 -----  
BrapaYUC4:18227-18692 -----  
LalabamicaYUC4:10757-11228 -----  
AthaYUC4:1570-2042 -----  
AlyraYUC4:240239-240713 -----  
CrubellaYUC4:86652-87138 -----  
CsativaYUC4:41129-41606 -----

TarvenseYUC4:58907-59887 AGTTAGATTTAATGCAATAATATTATATATTATTATTTTAAATTAATATAAAAATATAAA  
BnapusYUC41:12408-12873 -----  
BrapaYUC4:18227-18692 -----  
LalabamicaYUC4:10757-11228 -----  
AthaYUC4:1570-2042 -----  
AlyraYUC4:240239-240713 -----  
CrubellaYUC4:86652-87138 -----  
CsativaYUC4:41129-41606 -----

TarvenseYUC4:58907-59887 AATGTGAAATTTGAAAAGAAAAAATATATCTGTATAATTATGATTTTTCATATCTA  
BnapusYUC41:12408-12873 -----  
BrapaYUC4:18227-18692 -----  
LalabamicaYUC4:10757-11228 -----  
AthaYUC4:1570-2042 -----  
AlyraYUC4:240239-240713 -----  
CrubellaYUC4:86652-87138 -----  
CsativaYUC4:41129-41606 -----

TarvenseYUC4:58907-59887 TATGATACTAAAGTATATATAATTAATAAGTATATTAATATATATTAATCAGAGGCT  
BnapusYUC41:12408-12873 -----  
BrapaYUC4:18227-18692 -----  
LalabamicaYUC4:10757-11228 -----  
AthaYUC4:1570-2042 -----  
AlyraYUC4:240239-240713 -----  
CrubellaYUC4:86652-87138 -----  
CsativaYUC4:41129-41606 -----

TarvenseYUC4:58907-59887 CTAAGCATCTAACATTGCTAATATTGATTTGATCTATCATCATCTATCCAAGATCCACAAT  
BnapusYUC41:12408-12873 -----TATCGATAGTTTATACAGCATTGCTGATGTTGATCCATCCAAGATCCACAAT  
BrapaYUC4:18227-18692 -----TATCGATAGTTTATACAGCATTGCTGATGTTGATCCATCCAAGATCCACAAT  
LalabamicaYUC4:10757-11228 -----TATCGATAGTTTATACAGCATTGCTGATGTTGATCCATCCAAGTCCACAAT  
AthaYUC4:1570-2042 -----TATCGATAGTGTAAACAAGATTGCTGATGGTATCCATCCAAGGACCACAAT  
AlyraYUC4:240239-240713 -----TATCGATAGTGTAAACAAGATTGCTGATGTTGATCCATCCAAGAACCACAAT  
CrubellaYUC4:86652-87138 -----TATCGATAGTTTATACAGCATTGCTGATGTTGATCCATCCAAGAACCACAAT  
CsativaYUC4:41129-41606 -----TATCGATAGTTTATACAGATTGCTGATGTTGATCCATCCAAGAACCACAAT  
\* \* \* \* \*

TarvenseYUC4:58907-59887 ATTCCCTCGTCTAACCAAAGGGACCATCGATACACCTATGTAACATGCATATAAAGTAGAT  
BnapusYUC41:12408-12873 ATTCCTCGTCTAACCAAAGGGACCATCAATACATGCATGTAAGTAA-----  
BrapaYUC4:18227-18692 ATTCCTCGTCTAACCAAAGGGACCATCAATACATGCATGTAAGTAG-----  
LalabamicaYUC4:10757-11228 ATTCCTCGTCTAACCAAAGGGACCATGATGAATACATATATATGTAACATGCATATAAAGT  
AthaYUC4:1570-2042 ATTCCTCGTCTAACCAAAGGGACCATCAATACACTATGTAACAT-GCA----TATAGAGT  
AlyraYUC4:240239-240713 ATTCCTCGTCTAACCAAAGGGACCATTGATACTCTATATATGTA-ACATGCGTATAAAGT  
CrubellaYUC4:86652-87138 ATTCCTCGTCTAACCAAAGGGACCATCGATACACTATGTAACAT-GCATATGAACGAAGT  
CsativaYUC4:41129-41606 ATTCCTCGTCTAACCAAAGGGACCATCGATACACTATGTAACGT-GCATATAGAGTAGT-  
\*\*\*\*\* \*  
\* \* \* \* \*

TarvenseYUC4:58907-59887 TTAC---TAGTAGCTGATAC-----ACTTGTATTTTCTCCAGCTT  
BnapusYUC41:12408-12873 --ATTACTAGTAGCTGATACACTTGCATAG----CTTGT----AATTTCTCCTAGATT  
BrapaYUC4:18227-18692 --ATTACTAGTAGCTGATACACTTGCATAG----CTTGT----AATTTCTCCTAGATT  
LalabamicaYUC4:10757-11228 ATTTTACTAGTAGCTGATACACTTGTAT-----TTTTCTCCAGCTT  
AthaYUC4:1570-2042 AGATTAATAGTATAGCCGA---TACACTGTATAACTTGTAT----TTTTCTCCAGCTT  
AlyraYUC4:240239-240713 AGATT--AATAGTAGCTGA---TACACTGTATAACTTGTAT----TTTTCTCCAGCTT  
CrubellaYUC4:86652-87138 AGATTAGTAGTAGCTGATACACTTGTATTTGTATAACTTGTATTTTTTCTCCAGCAGCTT  
CsativaYUC4:41129-41606 ---TTAATAGTAGCTGATACACTTGTATAACTT----GTATTTTCTTACCAGCTAGCTT  
\* \* \* \* \*

- 1 **Supplementary Figure 7** DNA sequence alignment of the CRM1 region in the *YUC4* promoter.
- 2 DNA sequence information for all eight species was obtained from GenBank. No potential
- 3 YABBY binding sites were found in this region.
- 4

1

**a**

CRM2

|                                  |                                                               |
|----------------------------------|---------------------------------------------------------------|
| <u>BnapusYUC4</u> :14178-14351   | ----TAGTATGTTTAAATAGTATTATATAGCAATCTCAAAGGTTTCGTAGGGGAAGTGGAG |
| <u>BrapaYUC4</u> :16831-17018    | ----TAGTATGTTTAAATAGTATTATATAGCAACCTCAAAGGTTTCGTAGGGGAAGTGGAG |
| <u>CrubellaYUC4</u> :85613-85792 | AAAATATGTTAAATATTGATAATGCAAACCGCAGAGGAGATGATATAGGGGAAGTGGAG   |
| <u>AthaYUC4</u> :3184-3344       | -AAA-----TATGTTAAATATTGATATTGCAACCTTATAGAGATCATAGGGGAAGTGGAG  |
| <u>TarvenseYUC4</u> :57715-57890 | -AACTATGCTAAGTATTTAGTATATTTCAACCTCAAAGGAGGATCATAGGGGAAGTGGAG  |
| <u>AlyraYUC4</u> :238353-239045  | -AAATATGTTAA--ATATTGATATTGCAACCTCAGAGAAGAGATTATAGGGGAAGTGGAG  |
| <u>CsativaYUC4</u> :42737-42908  | -AGATATGCTGA--AAATTGATATTGCAACCTC--AGAGGAGATCATAGGGGAAGTGGAG  |

|                                  |                                                              |
|----------------------------------|--------------------------------------------------------------|
| <u>BnapusYUC4</u> :14178-14351   | GTAGGCTGCATTAGTTGACATTTTACCGAAGGAGTGGTCAGTCATGCGCAACGCAATTAC |
| <u>BrapaYUC4</u> :16831-17018    | GTAGGCTGCATTAGTTGACATTTTACCGAAGGAGTGGTCAGTCATGCGCAACGCAATTAC |
| <u>CrubellaYUC4</u> :85613-85792 | GTCGGCTGCATAAGTTGACATTTAA-CGAAGGAGTGGTCAGTCATGCGCAACTCAGTTA  |
| <u>AthaYUC4</u> :3184-3344       | GTCGGCTGCATTAGTTGACATTTAA-CGAAGGAGTGGCAAGTCAAATFACATTTTCCACA |
| <u>TarvenseYUC4</u> :57715-57890 | GTCGGCTGCATTAGTTGACATTTAA-CGAAGAAGTGGCCAGTCATGCGCAACACAGATAC |
| <u>AlyraYUC4</u> :238353-239045  | GTCGGCTGCATTAGTTGACATTTAA-CGAAGGAGCGGTCAGTCATGCGCAACTCAATTAC |
| <u>CsativaYUC4</u> :42737-42908  | GTCGGCTGCATTAGTTGACATTTAA-CGAAGGAGTGGTCAGTCATGCGCAACTCAATTAC |

|                                  |                                                              |
|----------------------------------|--------------------------------------------------------------|
| <u>BnapusYUC4</u> :14178-14351   | ATTTTCC---ACATATCTACTTATTAATTATGTGTTTGGTACAATCCTCATTAAAT---A |
| <u>BrapaYUC4</u> :16831-17018    | ATTTTCC---ACATATCTACTTACTAATATTAATTATGTGTTTGGTACAATCCTCATTAA |
| <u>CrubellaYUC4</u> :85613-85792 | CATTTTCCACATACATCTACTTATTAATTATGTGTTTGGTGCATCCTCATTAAATGTGT  |
| <u>AthaYUC4</u> :3184-3344       | -----TATCCAC-----                                            |
| <u>TarvenseYUC4</u> :57715-57890 | ATTTTCC---ACATATCTATTTATTACTTATGTGTTTGGTACAATCCTCGTTAATTGTTC |
| <u>AlyraYUC4</u> :238353-239045  | ATTTCCA---CATATCTACTTATTAATTATGTGTTTGGACCCTGTPTTGAA          |
| <u>CsativaYUC4</u> :42737-42908  | ATTTTCC---ACATATCTACTTATTAATTATGTGTTTGGTACAATCCTCATTAAATGTGC |

**b**

CRM3

|                                  |                                                                   |
|----------------------------------|-------------------------------------------------------------------|
| <u>BrapaYUC4</u> :16453-16513    | ACCTTTGTTTAGGTAAGCAATGTTAA--TTAGTAGGAAGTTAATTACCTGAGTCTTCTATAAT-  |
| <u>TarvenseYUC4</u> :57093-57154 | GCATTTGTTAAAGCAAGAAATGTTAA--TTATAGGCATTTTATTACATGAATCTTCTATTTTC   |
| <u>BnapusYUC4</u> :14668-14728   | ACCTTTGTTTAAAGTAAGAAATGTTAA--TTAGTGGGAAGTTAATTACCTGAGTCTTCTATAAT- |
| <u>CsativaYUC4</u> :43331-43392  | ACCTTTGTTAAAGTAAACAATATTTGAGTATTAGACATTTA-TTTAAATAAATCTTCCGTTT-   |
| <u>AthaYUC4</u> :3507-3569       | ACCTTTGTTAAAGTAAACAATATTTGATTAATTGATAAATTAATGACATGAATCTTCTGTTTC-  |
| <u>AlyraYUC4</u> :238044-238106  | ACCTTTGTTAAAGTAACAGTATTTGATTAATTAGGCAATTAATTACATGAATCTTCTGTTTC-   |

**c**

AAATATGTTAAATATTGATATTGCAACCTTATAGAGATCATAGGGGAAGTGGAGGTCGG  
 CTGCATTAGTTGACATTTAACGAAGGAGTGGCAAGTCAAATTACATTTTCCACATATCC  
 ACTTATTAATTATGTGTTTGGTGAATTTCTCATTAAATTGTGCTTGAATATATCATCCCT  
 CCAGCTACCTCAAATCAAAGCGTAGAAGTAGTTATCTTTTGATTATGTAT**CTTCTTT**  
 CTCACGAAAATGTAATAATCTATATGGTATACTATAATTTATGTTGGAAAGAAGATGAA  
 TACTTATGATGGAAAGAAGGTCATCTAAACCTTTGTTAAAGTAAACAATATTTGATTAA  
 TTGATAATTTAATGACATGAATCTTCTGTTTC

2  
3

**Supplementary Figure 8** DNA sequence alignment of the CRM2 and CRM3 regions in the *YUC4* promoter. **a**, **b** DNA sequence alignment of the CRM2 (**a**) and CRM3 regions (**b**). DNA sequence information for all eight species was obtained from GenBank. **c** DNA sequence between CRM2 and CRM3 in the *Arabidopsis thaliana YUC4* promoter where a potential YABBY binding site (bold) was identified.



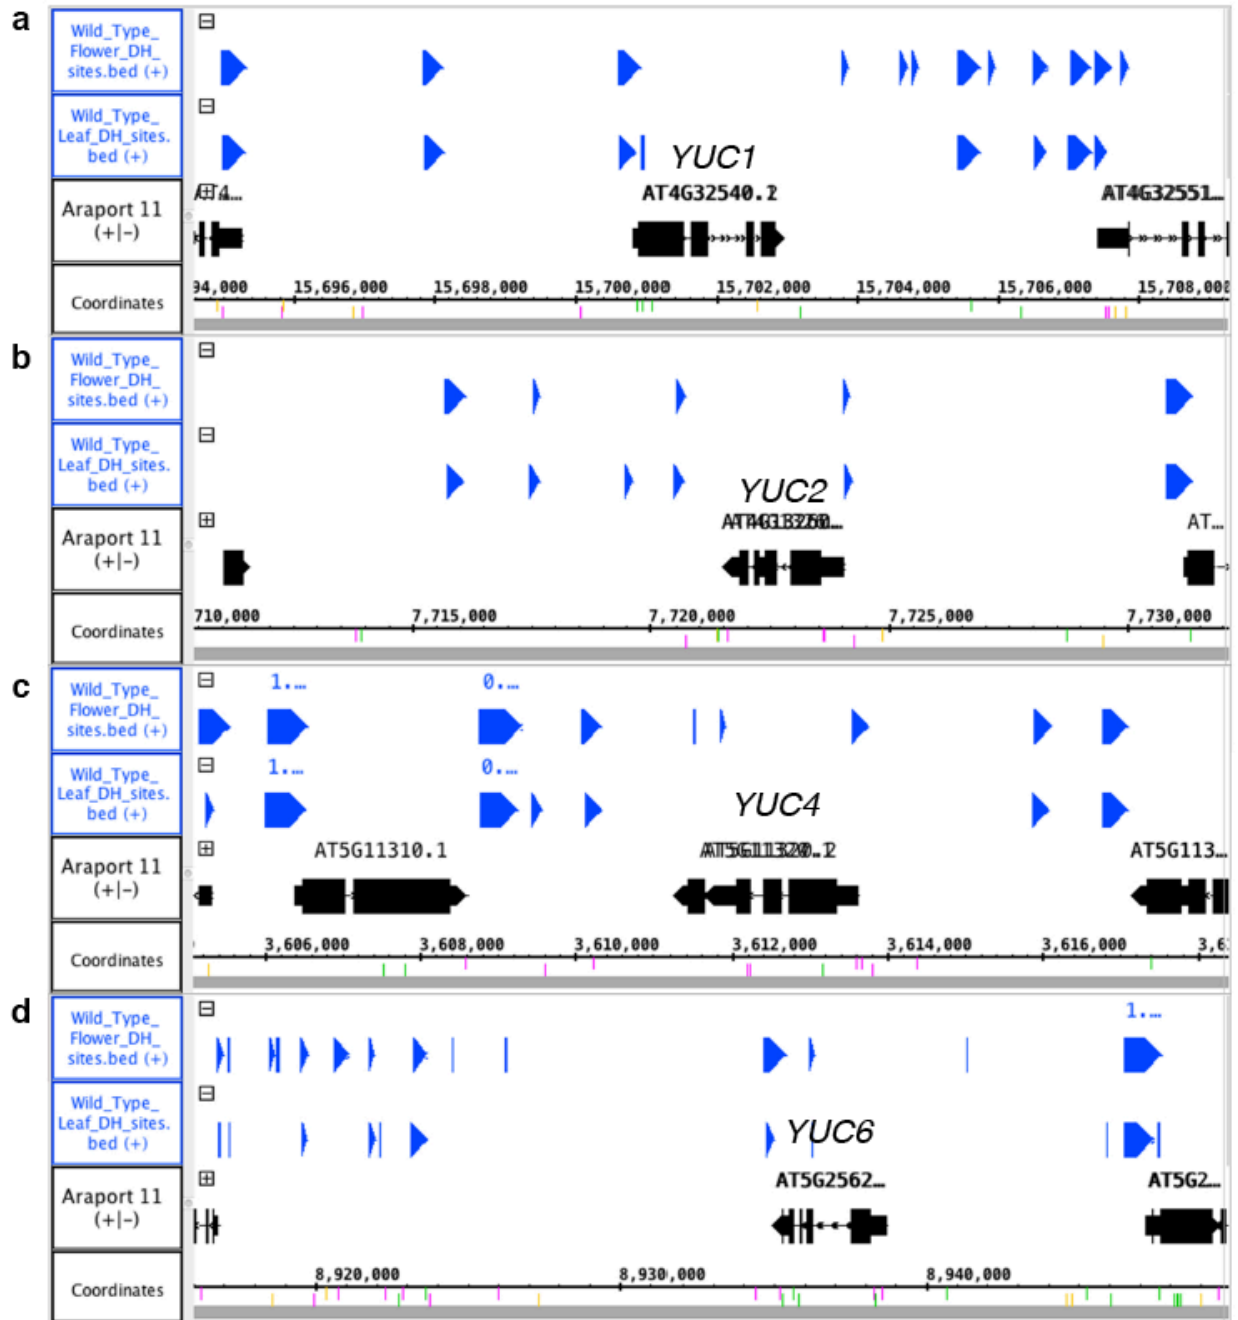

1  
2  
3  
4  
5  
6  
7  
8  
9

**Supplementary Figure 10** Regulatory region of the *YUC* genes. **a-d** Identification of the YABBY-binding sites by a DNase I HS assay and sequences of potential YABBY-binding sites in the *YUC1* (**a**), *YUC2* (**b**), *YUC4* (**c**), and *YUC6* (**d**) genes. Pink, GA[GA]AGAAA; Green, CC[CA][TC]C[TA][CT]C; Yellow, CCCCAC. Flower-specific DNase I HS sites, which contain four potential YABBY-binding sites were specifically observed in the 5' region of the *YUC4* promoter.

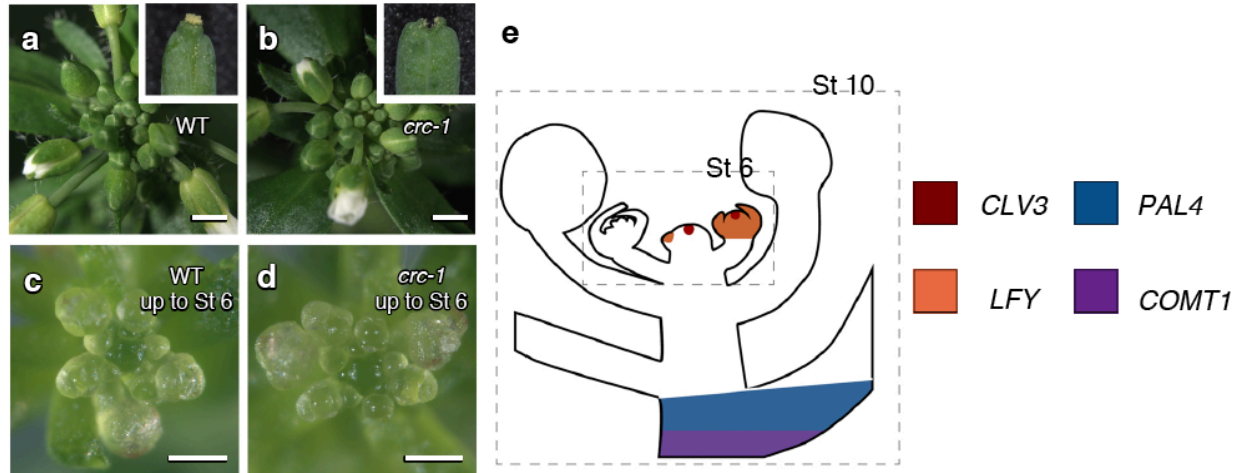

1  
2  
3  
4  
5  
6  
7  
8

**Supplementary Figure 11** Trimming of wild-type and *crc* inflorescences for auxin quantification. **a, b** Top view of wild-type (**a**), and *crc-1* (**b**) shoot apices. Fruit tips were shown in insets. **c, d** Top view of wild-type (**c**) and *crc-1* (**d**) shoot apices after removal of flowers from plants at stage 7 or later. Bars = 1 mm in **a, b**; 200  $\mu$ m in **c, d**. **e** Schematic diagram of spatial *CLV3*, *LFY*, *PAL4*, and *COMT1* expression patterns.

1

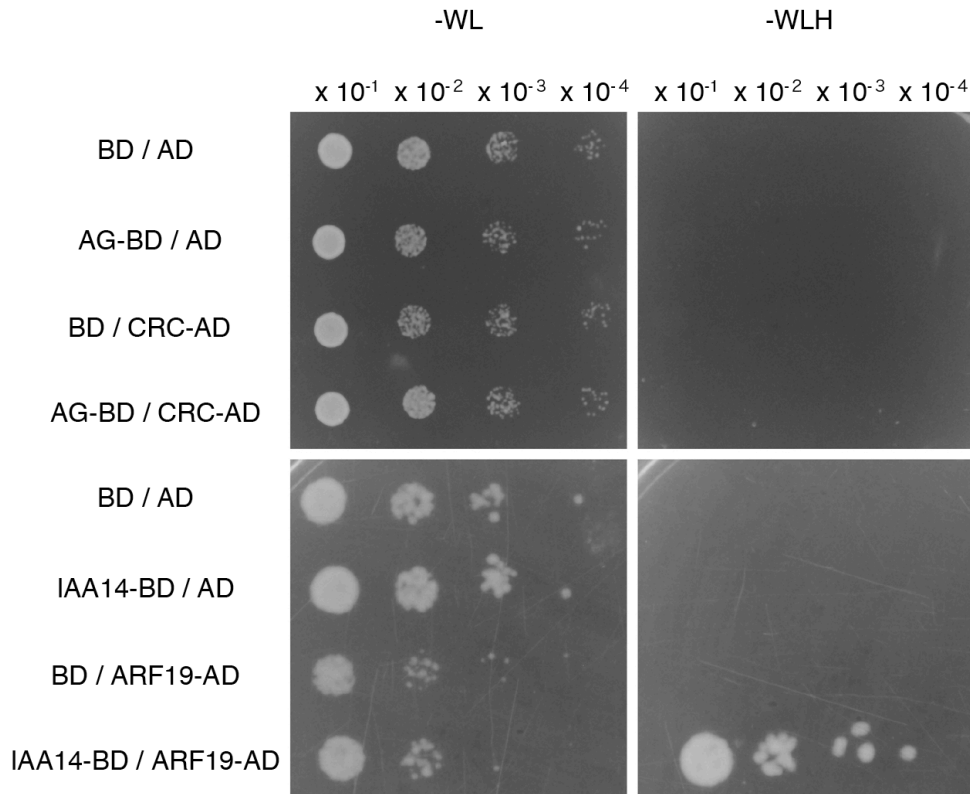

2

3

4 **Supplementary Figure 12** Yeast-two hybrid test for an AG-CRC interaction. Left; Yeast grown  
5 under nonselective conditions (-WL). Right; Yeast grown under selective conditions (-WLH).  
6 Double transformants carrying both the *pDEST22* and *pDEST32* empty vectors were used as a  
7 negative control. A positive AUXIN RESPONSE FACTOR19 and IAA14 interaction was  
8 detected under our experimental conditions<sup>1</sup>.

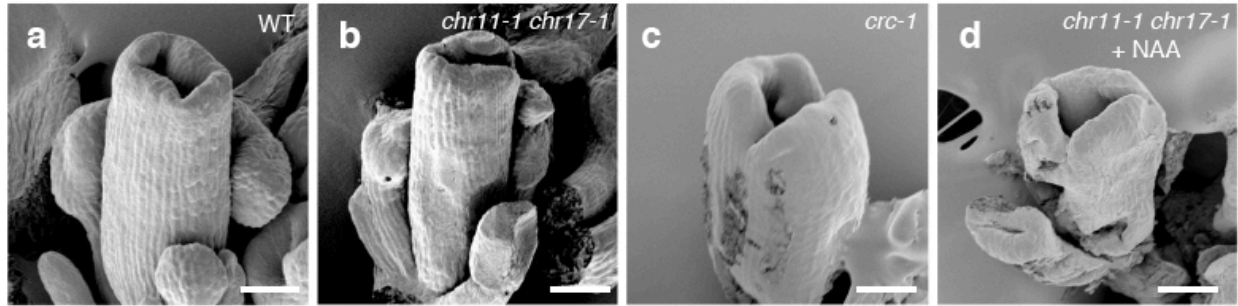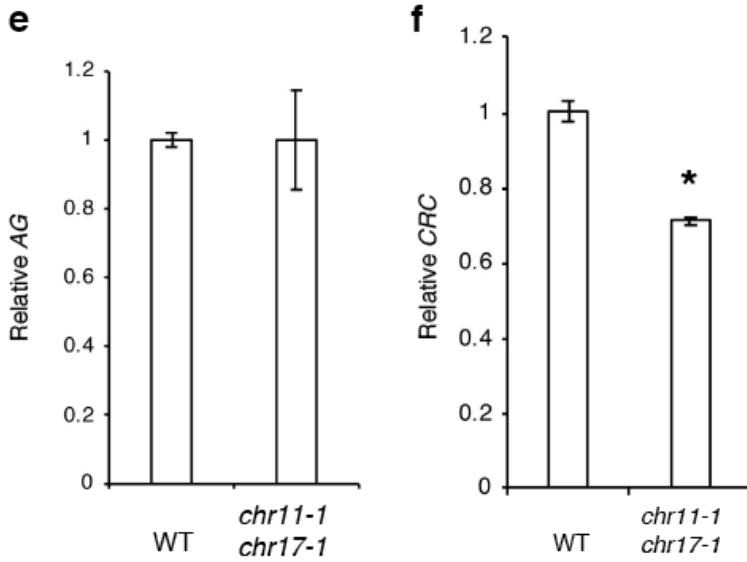

1  
2  
3  
4  
5  
6  
7  
8  
9

**Supplementary Figure 13** Characterization of the *chr11-1 chr17-1* double mutants. **a-d** Scanning electron micrograph of the wild-type (**a**), *chr11-1 chr17-1* (**b**), *crc-1* (**c**), and auxin-treated *chr11-1 chr17-1* (**d**) gynoecia. **e, f** *AG* (**e**) and *CRC* (**f**) mRNA levels in the wild-type and *chr11-1 chr17-1* floral buds. The values are represented as the means  $\pm$  SEMs. *p*-values were calculated using a Student's *t*-test. \*: *p* < 0.05 compared to the wild type. Bars = 60  $\mu$ m in **a-d**.



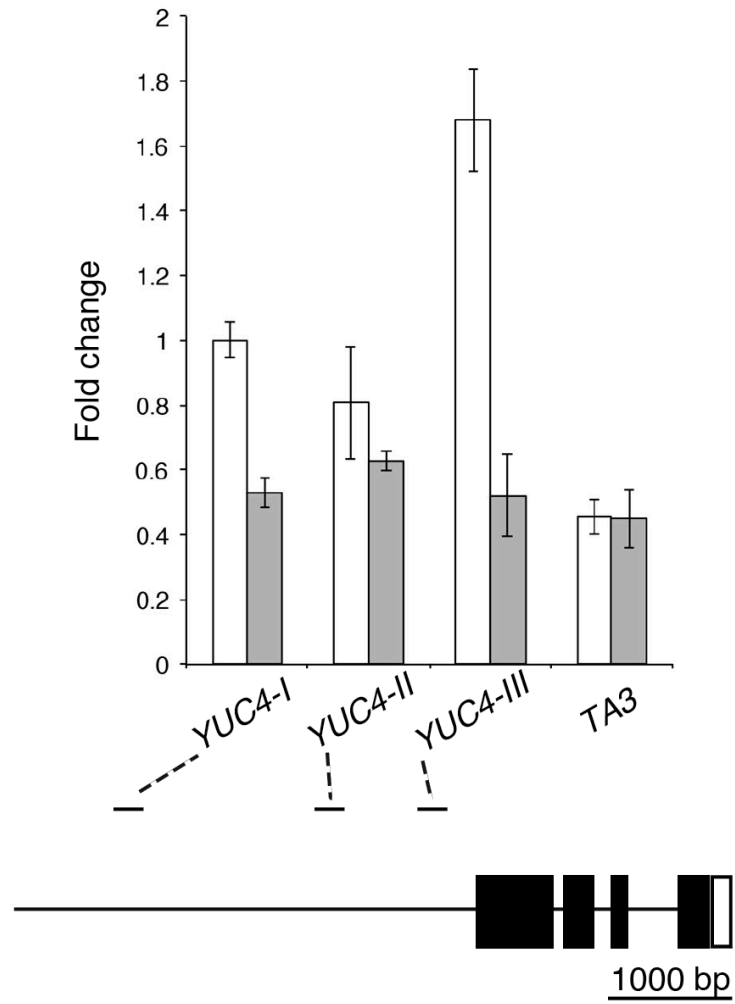

1  
2 **Supplementary Figure 14** AG ChIP enrichment at the *YUC4* locus. Top: Anti AG ChIP to test  
3 AG occupancy at the *YUC4* locus. The values are represented as the means  $\pm$  SEMs. Bottom:  
4 Diagram of the ChIP-qPCR amplicons tested.  
5

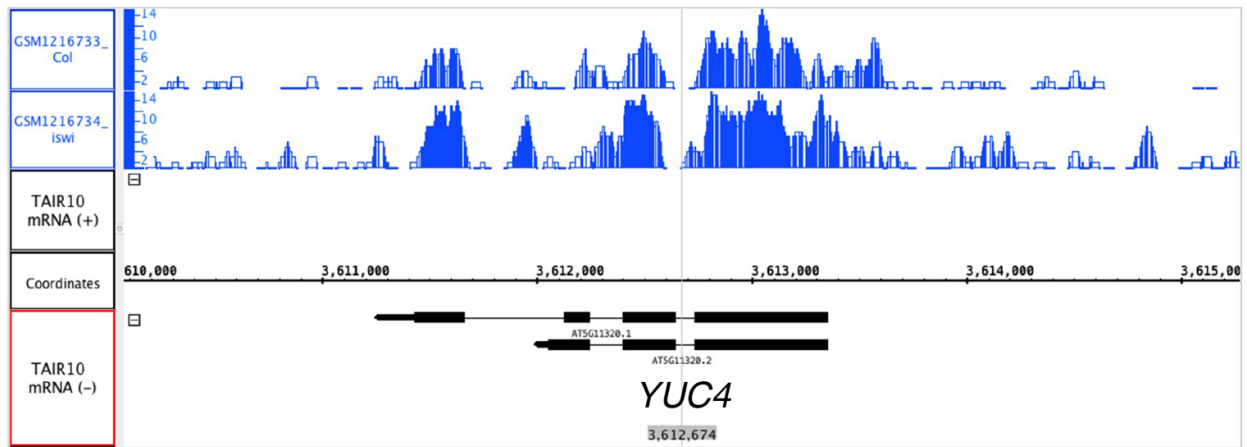

1  
2  
3  
4  
5  
6

**Supplementary Figure 15** Published MNase-seq data in wild-type and *chr11-1 chr17-1* plants. Nucleosome positioning identified by MNase-seq. Blue bars: Nucleosome occupancy. Black square: exon. Black line: intron.

1

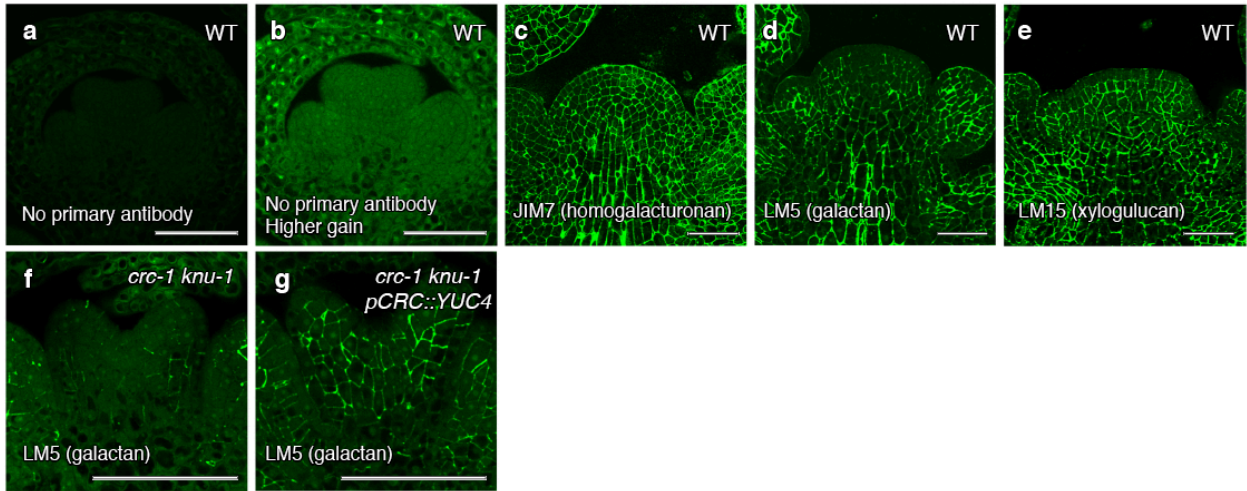

2

3

4 **Supplementary Figure 16** Immunolocalization of cell wall components in the inflorescence  
5 meristem. **a, b** Immunolocalization using longitudinal sections of wild-type stage 6 flowers  
6 without the primary antibody. Without primary antibody (**a**). Without primary antibody when  
7 images were taken at higher gain settings. (**b**). Cell wall specific-fluorescence was not  
8 observed without primary antibody. The same section was used for **a** and **b**. **c**  
9 Immunolocalization of homogalacturonan epitopes was detected with JIM7 in longitudinal  
10 sections of the wild-type inflorescence meristem. **d** Immunolocalization of (1-4)- $\beta$ -D-galactan  
11 epitopes was detected with LM5 in longitudinal sections of the wild-type inflorescence  
12 meristem. **e** Immunolocalization of xyloglucan epitopes was detected with LM15 using  
13 longitudinal sections of the wild-type inflorescence meristem. **f, g** Immunolocalization of  
14 (1-4)- $\beta$ -D-galactan epitopes was detected with LM5 in longitudinal sections of the *crc-1*  
15 *knu-1* (**f**) and *crc-1 knu-1 pCRC::YUC4* (**g**) terminating floral meristem. Half-strength of  
16 antibody was used. Bars = 50  $\mu$ m in **a-g**.

17

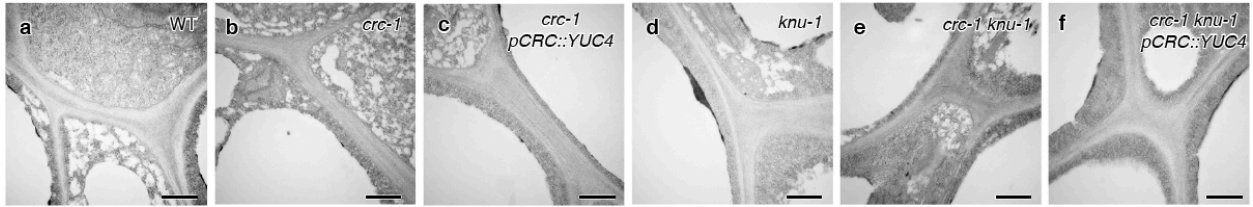

1  
2  
3  
4  
5  
6  
7

**Supplementary Figure 17** TEM image of stage 6 terminating floral meristem cells. **a-f** TEM images of longitudinal sections from wild-type (**a**), *crc-1* (**b**), *crc-1 pCRC::YUC4* (**c**), *knu-1* (**d**), *crc-1 knu-1* (**e**), and *crc-1 knu-1 pCRC::YUC4* (**f**) terminating floral meristem at flower development stage 6. All images are shown at the same magnification. Bars = 500 nm in **a-f**.

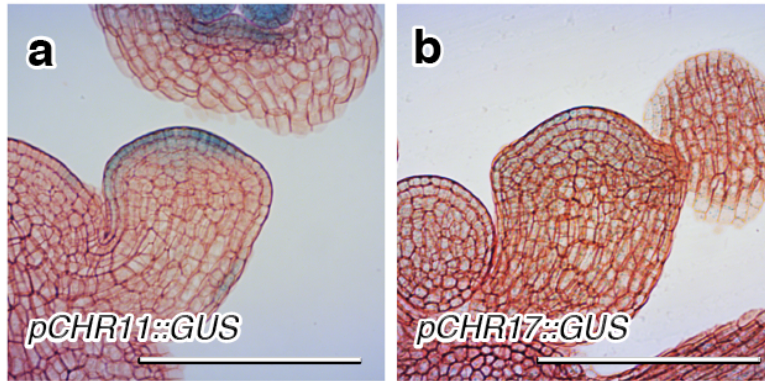

1  
2  
3  
4  
5  
6

**Supplementary Figure 18** Expression of *pCHR11::GUS* and *pCHR17::GUS* in stage 3 floral buds.  
**a, b** GUS staining of *pCHR11::GUS* (**a**) and *pCHR17::GUS* (**b**) in stage 3 floral meristems. Bars =  
50  $\mu$  m in **a, b**.

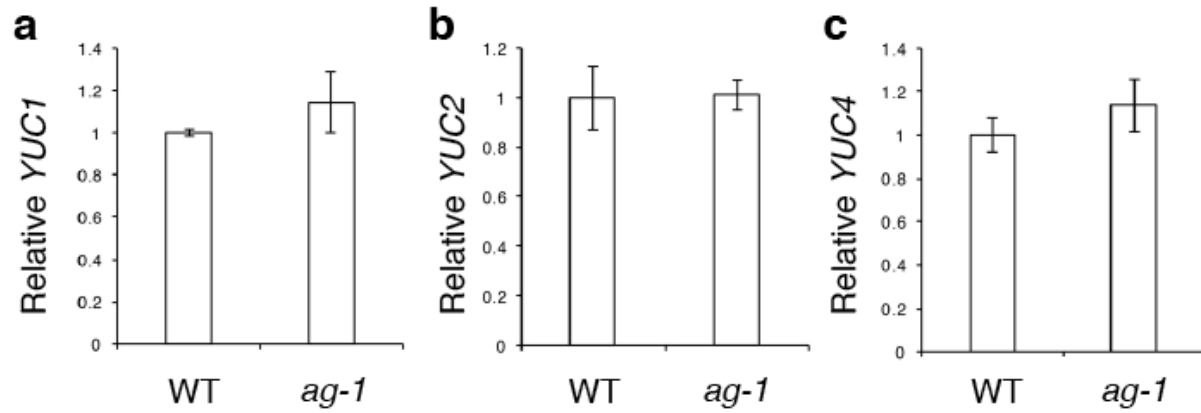

1  
2  
3  
4  
5  
6

**Supplementary Figure 19** Expression of *YUC* family genes in the wild type and *ag-1* mutant. **a-c** mRNA abundance of *YUC1* (a), *YUC2* (b), and *YUC6* (c) in wild-type and *ag-1* plants. The values are represented as the means  $\pm$  SEMs.

1 **Supplementary Table 1** Summary of transcriptomic datasets used to identify genes regulated  
 2 by AG and CRC.  
 3

| Dataset                        | Developmental stage/tissue                  | Number of genes | Annotation | Data References |
|--------------------------------|---------------------------------------------|-----------------|------------|-----------------|
| WT vs <i>ag-12*</i>            | More than 3 weeks old (flowers at stage 12) | 6673            | TIGR 5.0   | 2               |
| <i>knu-1 vs crc-1 knu-1*</i>   | Floral bud clusters up to stage 10          | 8150            | TAIR 7     | 3               |
| <i>ag-11 ap2-35 vs ag-11**</i> | Floral bud clusters up to stage 7           | 2093            | TAIR 10    | 4               |
| <i>ag-11 ap2-43 vs ag-11**</i> | Floral bud clusters up to stage 7           | 2026            | TAIR 10    | 4               |
| AG ChIP                        | Synchronized floral bud clusters at stage 5 | 1421            | TAIR10     | 5               |

4  
 5  
 6 \* Array data were downloaded from TAIR (ATGE\_58A-C, ATGE\_92A-C) and GEO (GSE88969) and reanalyzed.  
 7 Genes showing at least a 1.5-fold change in expression were considered to be differentially expressed.  
 8 \*\* The data were obtained from Huang et al., 2016<sup>4</sup>. Genes showing a 1.5-fold change in expression were  
 9 considered to be differentially expressed, as written in Huang et al., 2016<sup>4</sup>.

10  
 11  
 12

1 **Supplementary References**

2  
3 1. H. Fukaki, Y. Nakao, Y. Okushima, A. Theologis, M. Tasaka, Tissue-specific expression  
4 of stabilized SOLITARY-ROOT/IAA14 alters lateral root development in Arabidopsis. *Plant*  
5 *J.* **44**, 382-395 (2005).

6  
7 2. M. Schmid, T.S. Davison, S.R. Henz, U.J. Pape, M. Demar, M. Vingron, B. Scholkopf, D.  
8 Weigel, J.U. Lohman, A gene expression map of *Arabidopsis thaliana* development. *Nature*  
9 *Genet.* **37**, 501-506 (2005).

10  
11 3. N. Yamaguchi, J. Huang, Y. Xu, K. Tanoi, T. Ito, Fine-tuning of auxin homeostasis  
12 governs the transition from floral stem cell maintenance to gynoecium formation. *Nature*  
13 *Communications* **8**, 1125 (2017).

14  
15 4. Z. Huang, T. Shi, B. Zheng, R.E. Yumul, X. Liu, C. You, Z. Gao, L. Xiao, X. Chen,  
16 *APETALA2* antagonizes the transcriptional activity of *AGAMOUS* in regulating floral stem  
17 cells in *Arabidopsis thaliana*. *New Phytol.* **215**, 1197-1209 (2017).

18  
19 5. D.S. O'Maileidigh, S.E. Wuest, L. Rae, A. Raganelli, P.T. Ryan, K. Kwasniewska, P. Das,  
20 A.J. Lohan, B. Loftus, E. Graciet, F. Wellmer, Control of reproductive floral organ identity  
21 specification in *Arabidopsis* by the C function regulator *AGAMOUS*. *Plant Cell* **25**,  
22 2482-2503 (2013).
